# Supplementary material for: Influence of halogen–halogen interactions in the self-assembly of pillar[5]arene-based supramolecular polymers
Source: Royal Society of Chemistry journal article supplement (doi:10.1039/d4ra03769c), 2024-01-01
Supplement: d4ra03769c1.pdf [file d4ra03769c1.pdf]

## Supplementary Information

### Influence of Halogen-Halogen Interactions in the Self-Assembly of Pillar[5]arene-Based Supramolecular Polymers

Mickey Vinodh, Anwar A. Alshammari and Talal F. Al-Azemi\*  
*Chemistry Department, Kuwait University, P.O. Box 5969, Safat 13060, Kuwait*

#### Table of contents

|                                                                                                                                                              |     |
|--------------------------------------------------------------------------------------------------------------------------------------------------------------|-----|
| Single crystal X-ray diffraction data                                                                                                                        | S2  |
| <sup>1</sup> H NMR spectra of <b>DMP5</b> at different concentrations of 1,4-dihaloalkanes                                                                   | S8  |
| Plot of <sup>1</sup> H NMR chemical shift changes of <b>DMP5</b> as function of 1,4-dihaloalkanes concentration                                              | S10 |
| Host-guest complexation ITC experiment raw heats for <b>DMP5</b> with 1,4-dihaloalkanes                                                                      | S14 |
| Experimental 2D <sup>1</sup> H Diffusion spectra for the inclusion complexes                                                                                 | S15 |
| ITC dilution raw heats for sequential injection of 4-dimethylaminopyridine ( <b>DMAP</b> ) in chloroform at 25 °C to a 10 mM of [ <b>DMP5</b> ⊃ <b>DIB</b> ] | S17 |
| <sup>1</sup> H NMR spectra of spectra of [ <b>DMP5</b> ⊃ <b>DIB</b> ] at different concentrations of 4-dimethylaminopyridine ( <b>DMAP</b> )                 | S18 |
| <sup>1</sup> H NMR spectra of [ <b>DMP5</b> ⊃ <b>DIB</b> ] with 2 equivalents quantity of <b>DMAP</b> and <b>DMAP</b> alone                                  | S18 |
| Plot of <sup>1</sup> H NMR chemical shift changes of [ <b>DMP5</b> ⊃ <b>DIB</b> ] as function of 4-dimethylaminopyridine ( <b>DMAP</b> ) concentration       | S19 |

\* Corresponding author.

E-mail address: t.alazemi@ku.edu.kw.

**Single crystal X-ray diffraction analysis:****Table S1.** Crystal data and experimental parameters of the structural analysis of [DMP5  $\supset$  DFB] and [DMP5  $\supset$  DCB].

| Crystal sample                                                              | [DMP5 $\supset$ DFB]                                           | [DMP5 $\supset$ DCB]                                                                                 |
|-----------------------------------------------------------------------------|----------------------------------------------------------------|------------------------------------------------------------------------------------------------------|
| Chemical formula                                                            | C <sub>49</sub> H <sub>58</sub> F <sub>2</sub> O <sub>10</sub> | C <sub>53</sub> H <sub>66</sub> Cl <sub>4</sub> O <sub>10</sub>                                      |
| $M_r$                                                                       | 844.95                                                         | 1004.85                                                                                              |
| Crystal system, space group                                                 | Tetragonal, $I4_1/a$                                           | Triclinic, $P-1$                                                                                     |
| Temperature (K)                                                             | 150                                                            | 296                                                                                                  |
| $a, b, c$ (Å)                                                               | 15.0762 (13), 15.0762 (13),<br>39.5384 (15)                    | 10.2873 (3), 12.1713 (4), 22.7710<br>(8)                                                             |
| $\alpha, \beta, \gamma$ (°)                                                 | 90, 90, 90                                                     | 90.681 (2), 98.012 (2), 109.405 (2)                                                                  |
| $V$ (Å <sup>3</sup> )                                                       | 8986.7 (16)                                                    | 2657.76 (15)                                                                                         |
| $Z$                                                                         | 8                                                              | 2                                                                                                    |
| Radiation type                                                              | Mo $K\alpha$                                                   | Cu $K\alpha$                                                                                         |
| $\mu$ (mm <sup>-1</sup> )                                                   | 0.09                                                           | 2.47                                                                                                 |
| Crystal size (mm)                                                           | 0.20 $\times$ 0.18 $\times$ 0.17                               | 0.25 $\times$ 0.21 $\times$ 0.15                                                                     |
| Diffractometer                                                              | Rigaku R-AXIS RAPID                                            | Bruker APEX-II CCD                                                                                   |
| Absorption correction                                                       | Multi-scan<br><i>ABSCOR</i> (Rigaku, 1995)                     | Multi-scan<br><i>SADABS2016/2</i> - Bruker AXS area<br>detector scaling and absorption<br>correction |
| $T_{\min}, T_{\max}$                                                        | 0.665, 0.985                                                   | 0.57, 0.71                                                                                           |
| No. of measured, independent &<br>observed [ $I > 2\sigma(I)$ ] reflections | 36777, 3949, 2547                                              | 24970, 9182, 6770                                                                                    |
| $R_{\text{int}}$                                                            | 0.056                                                          | 0.036                                                                                                |
| $(\sin \theta/\lambda)_{\text{max}}$ (Å <sup>-1</sup> )                     | 0.595                                                          | 0.595                                                                                                |
| $R[F^2 > 2\sigma(F^2)], wR(F^2), S$                                         | 0.070, 0.226, 1.04                                             | 0.072, 0.224, 1.02                                                                                   |
| No. of reflections                                                          | 3949                                                           | 9182                                                                                                 |
| No. of parameters                                                           | 281                                                            | 642                                                                                                  |
| No. of restraints                                                           | 20                                                             | 70                                                                                                   |
| H-atom treatment                                                            | Constrained                                                    | Constrained                                                                                          |

|                                                                 |             |             |
|-----------------------------------------------------------------|-------------|-------------|
| $\Delta\rho_{\max}, \Delta\rho_{\min}$ ( $e \text{ \AA}^{-3}$ ) | 0.50, -0.29 | 0.53, -0.46 |
|-----------------------------------------------------------------|-------------|-------------|

**Table S1.** Crystal data and experimental parameters of the structural analysis of [DMP5  $\supset$  DBB] and [DMP5  $\supset$  DIB].

| Crystal sample                                                           | [DMP5 $\supset$ DBB]                                            | [DMP5 $\supset$ DIB]                                             |
|--------------------------------------------------------------------------|-----------------------------------------------------------------|------------------------------------------------------------------|
| Chemical formula                                                         | C <sub>53</sub> H <sub>66</sub> Br <sub>4</sub> O <sub>10</sub> | C <sub>104</sub> H <sub>128</sub> I <sub>7</sub> O <sub>20</sub> |
| $M_r$                                                                    | 1182.69                                                         | 2586.36                                                          |
| Crystal system, space group                                              | Triclinic, <i>P</i> -1                                          | Triclinic, <i>P</i> -1                                           |
| Temperature (K)                                                          | 150                                                             | 150                                                              |
| $a, b, c$ ( $\text{\AA}$ )                                               | 10.3567 (8), 12.1184 (9),<br>22.4299 (15)                       | 10.6280 (9), 12.2335 (12), 23.534<br>(2)                         |
| $\alpha, \beta, \gamma$ ( $^\circ$ )                                     | 91.283 (6), 95.977 (7), 110.754<br>(8)                          | 88.021 (6), 77.859 (6), 71.497 (5)                               |
| $V$ ( $\text{\AA}^3$ )                                                   | 2612.8 (3)                                                      | 2835.1 (5)                                                       |
| $Z$                                                                      | 2                                                               | 1                                                                |
| Radiation type                                                           | Mo $K\alpha$                                                    | Mo $K\alpha$                                                     |
| $\mu$ ( $\text{mm}^{-1}$ )                                               | 3.14                                                            | 1.98                                                             |
| Crystal size (mm)                                                        | 0.25 $\times$ 0.05 $\times$ 0.04                                | 0.16 $\times$ 0.11 $\times$ 0.06                                 |
| Diffractometer                                                           | Rigaku R-AXIS RAPID                                             | Rigaku R-AXIS RAPID                                              |
| Absorption correction                                                    | Multi-scan<br><i>ABSCOR</i> (Rigaku, 1995)                      | Multi-scan<br><i>ABSCOR</i> (Rigaku, 1995)                       |
| $T_{\min}, T_{\max}$                                                     | 0.388, 0.882                                                    | 0.542, 0.873                                                     |
| No. of measured, independent & observed [ $I > 2\sigma(I)$ ] reflections | 18256, 9072, 4246                                               | 34070, 9826, 4559                                                |
| $R_{\text{int}}$                                                         | 0.087                                                           | 0.067                                                            |
| $(\sin \theta/\lambda)_{\max}$ ( $\text{\AA}^{-1}$ )                     | 0.595                                                           | 0.595                                                            |
| $R[F^2 > 2\sigma(F^2)]$ , wR( $F^2$ ), S                                 | 0.065, 0.179, 0.91                                              | 0.120, 0.399, 1.23                                               |
| No. of reflections                                                       | 9072                                                            | 9826                                                             |
| No. of parameters                                                        | 614                                                             | 651                                                              |
| No. of restraints                                                        | 577                                                             | 151                                                              |
| H-atom treatment                                                         | Constrained                                                     | Constrained                                                      |
| $\Delta\rho_{\max}, \Delta\rho_{\min}$ ( $e \text{ \AA}^{-3}$ )          | 1.16, -1.10                                                     | 1.66, -1.12                                                      |

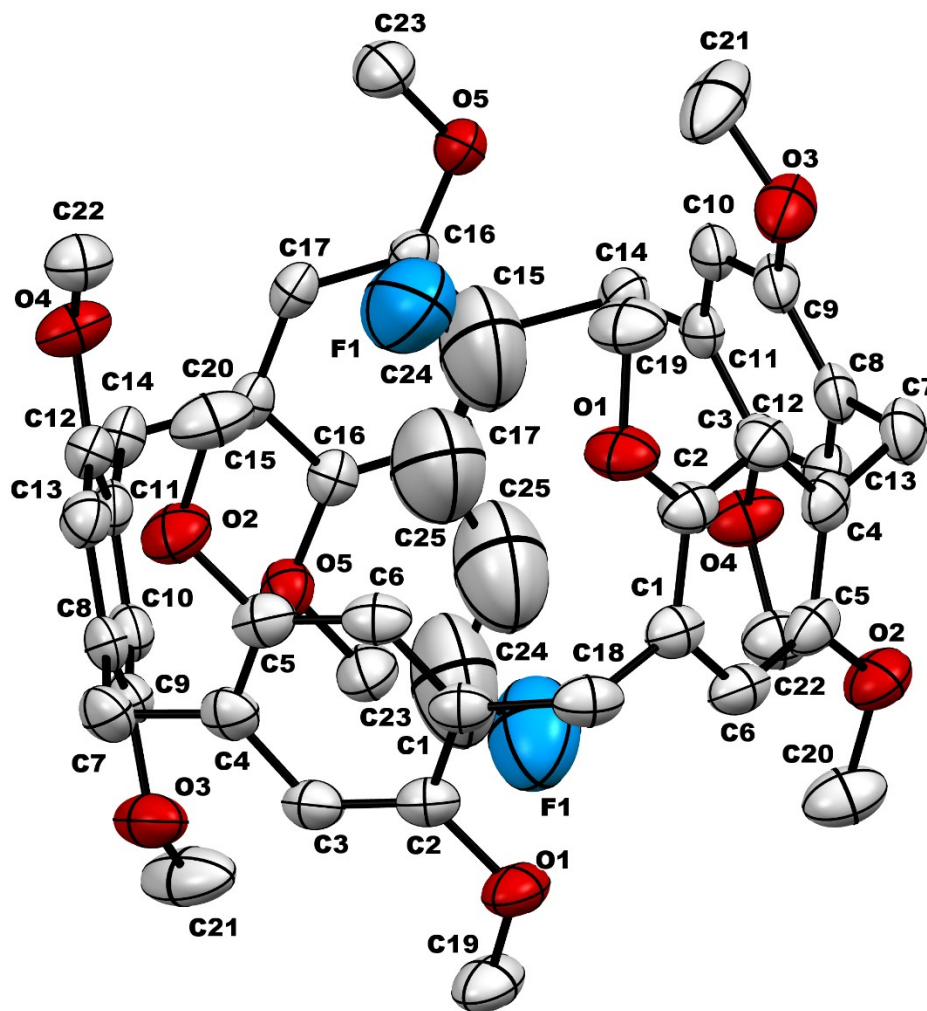

**Figure S1.** Thermal ellipsoid representation (30% probability) of DPM5⊃BuF2 crystal (Hydrogen atoms are hidden for clarity)

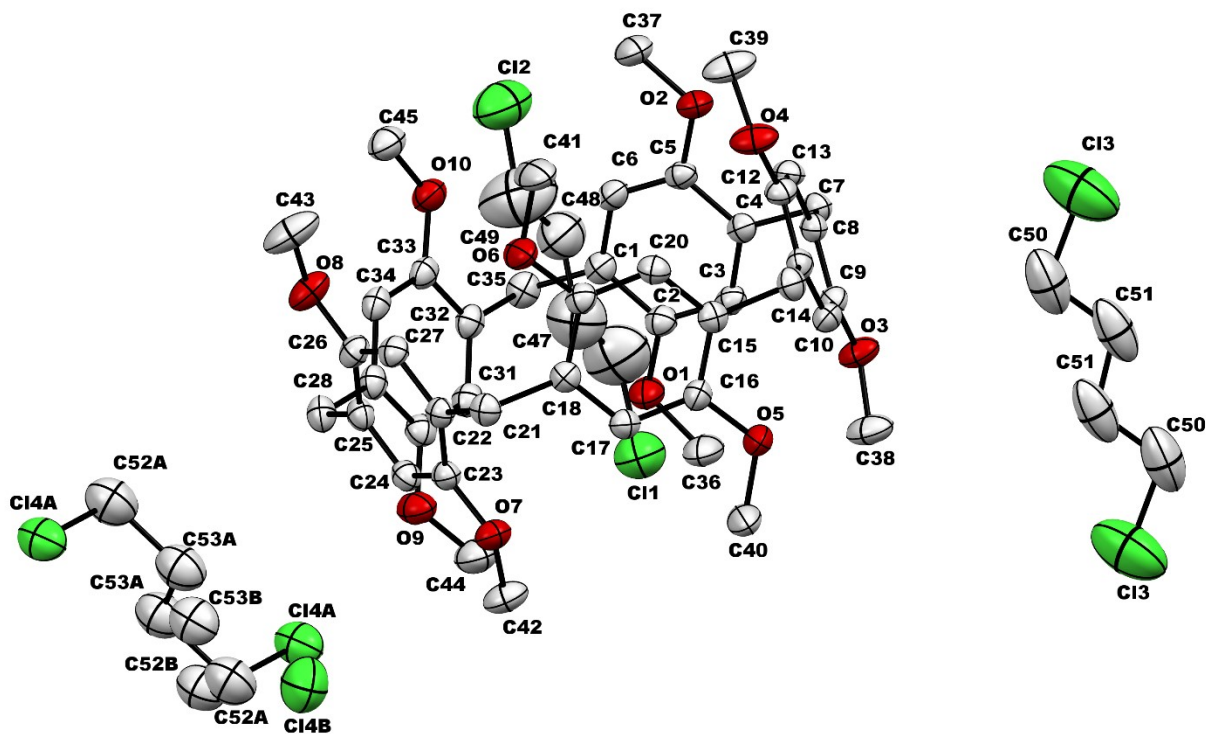

**Figure S2.** Thermal ellipsoid representation (30% probability) of DPM5⊃BuCl<sub>2</sub> crystal (Hydrogen atoms are hidden for clarity)

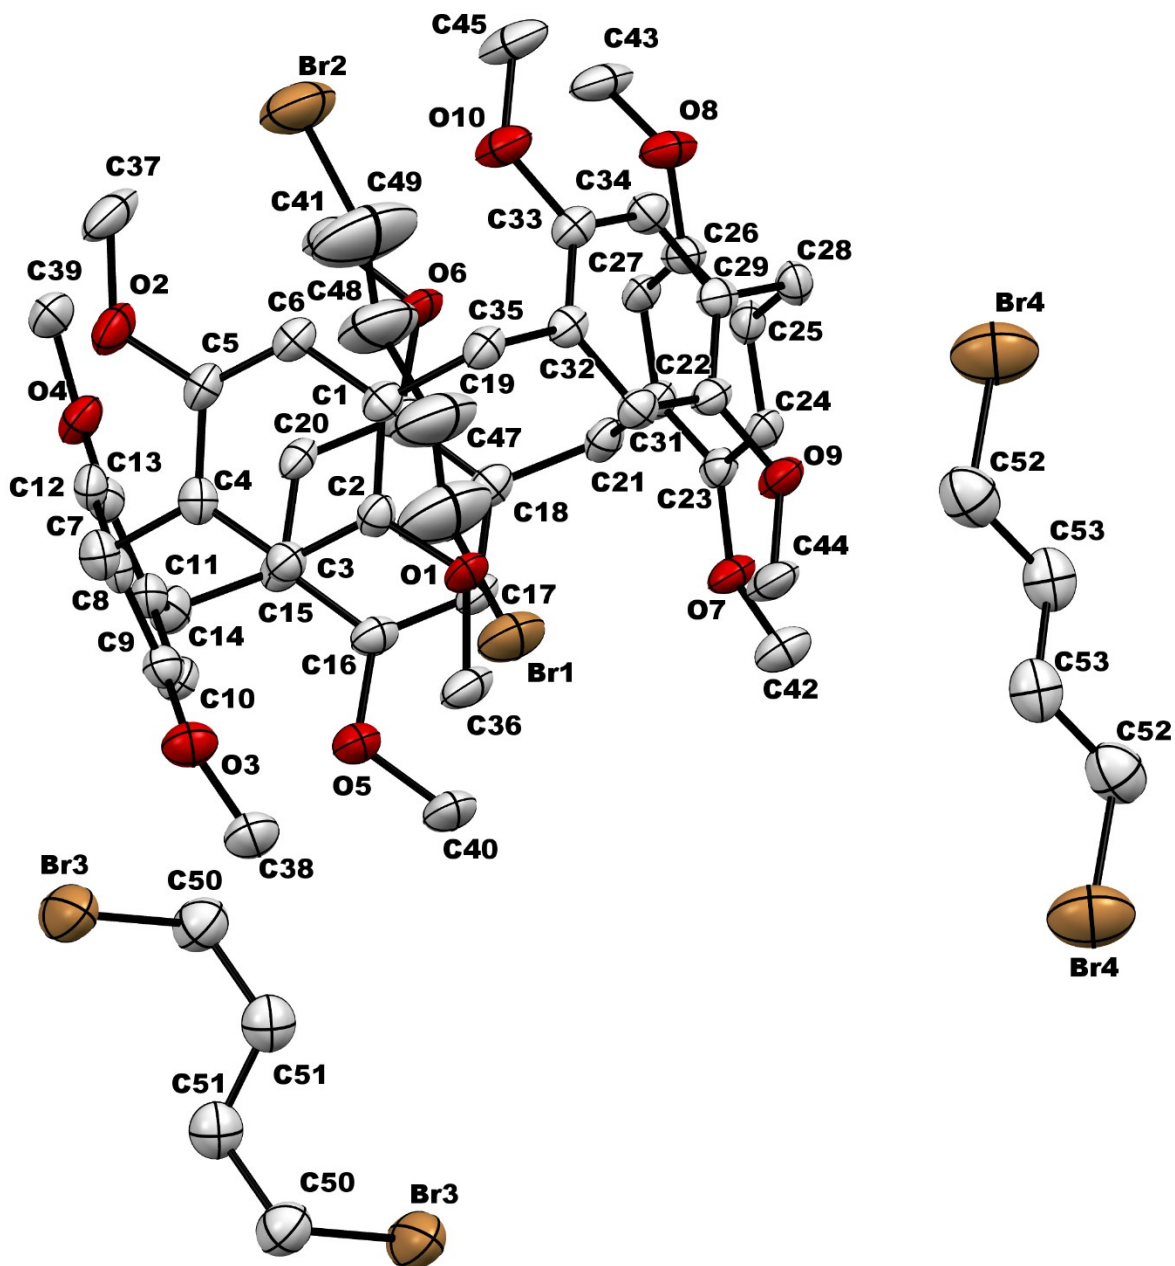

**Figure S3.** Thermal ellipsoid representation (50% probability) of DPM5⊃BuBr2 crystal (Hydrogen atoms are hidden for clarity)

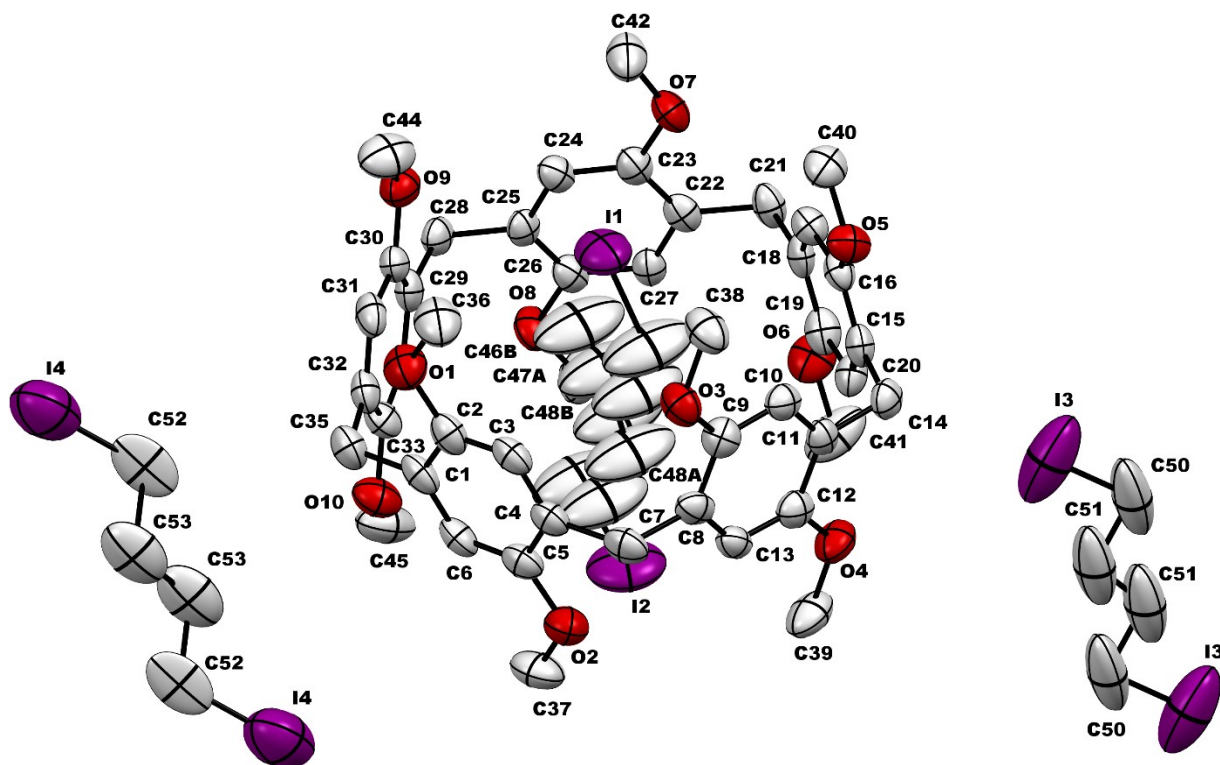

**Figure S4.** Thermal ellipsoid representation (30% probability) of DPM5⊃BuI2 crystal (Hydrogen atoms are hidden for clarity).

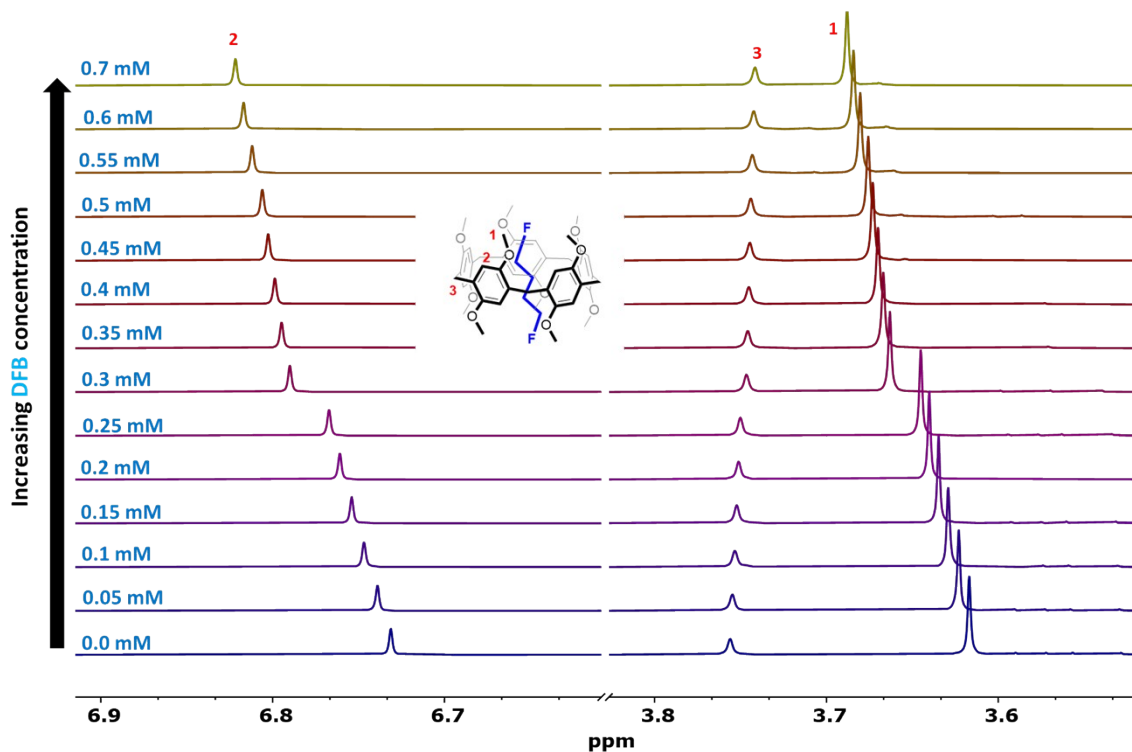

**Figure S5.** Expanded <sup>1</sup>H-NMR (600 MHz, CDCl<sub>3</sub>, 298 K) spectra of **DMP5** (5 mM) with increasing equimolar quantities (0 → 1.4 eq.) of 1,4-difluorobutane (**DFB**).

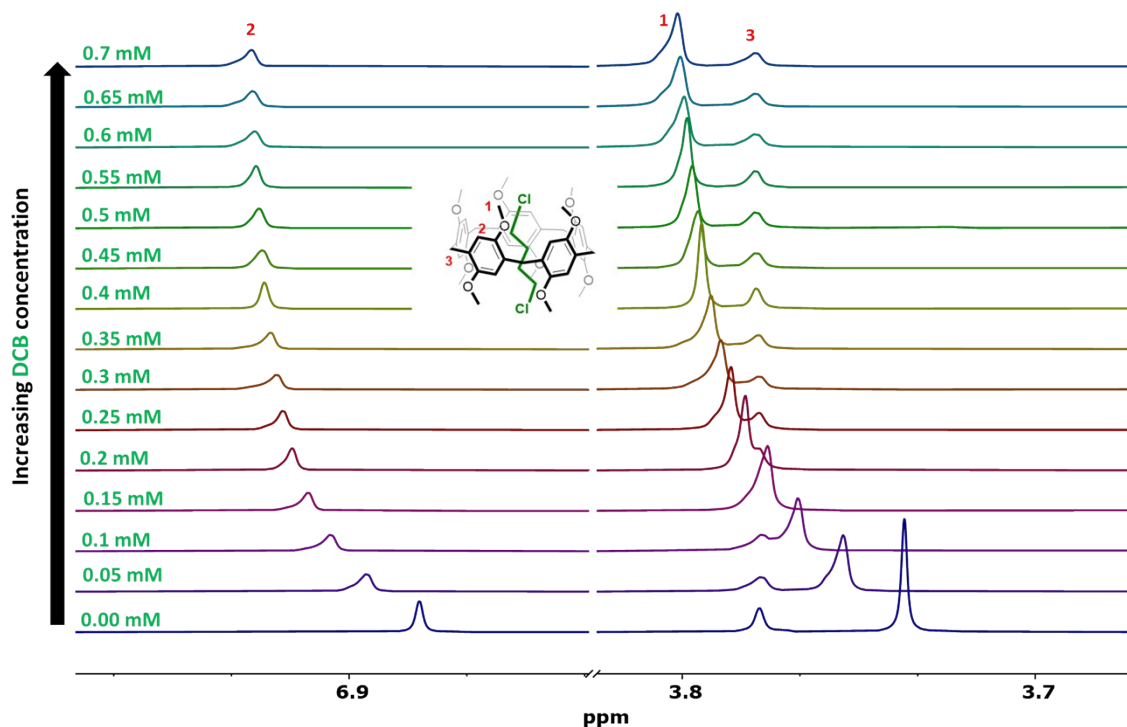

**Figure S6.** Expanded <sup>1</sup>H-NMR (600 MHz, CDCl<sub>3</sub>, 298 K) spectra of **DMP5** (5 mM) with increasing equimolar quantities (0 → 1.4 eq.) of 1,4-dichlorobutane (**DCB**).



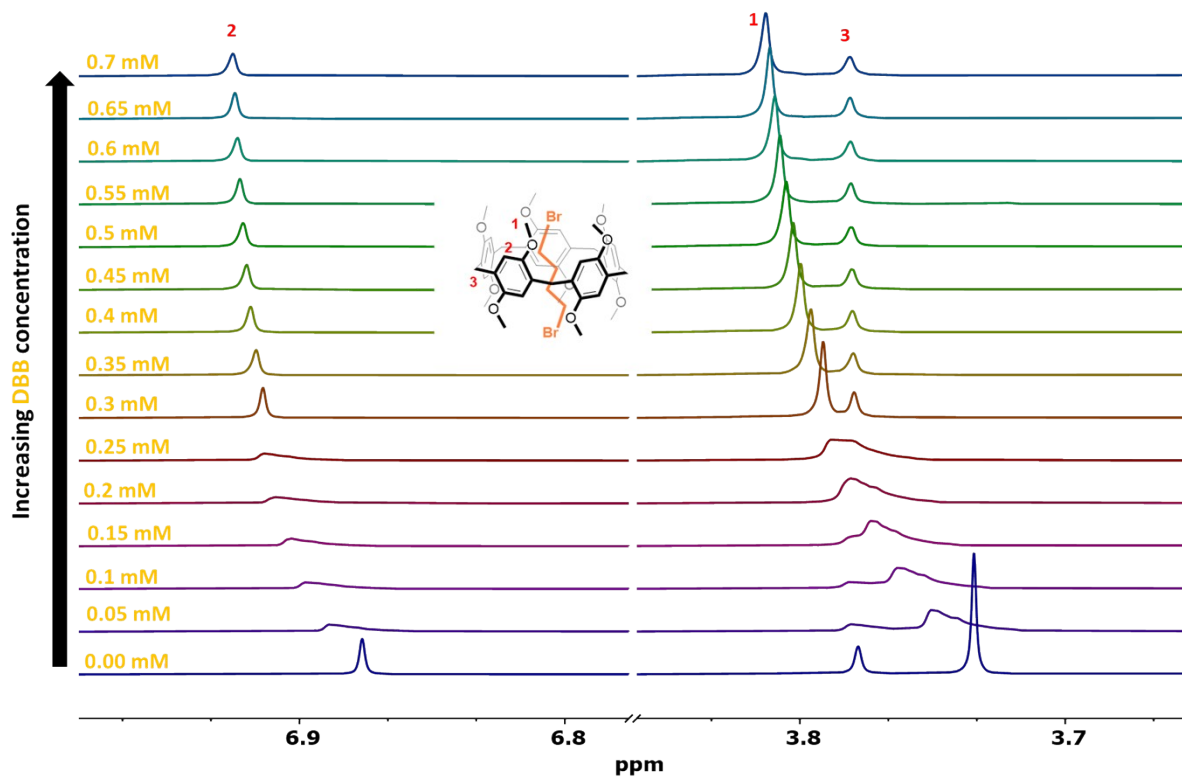

**Figure S7.** Expanded <sup>1</sup>H-NMR (600 MHz, CDCl<sub>3</sub>, 298 K) spectra of **DMP5** (5 mM) with increasing equimolar quantities (0 → 1.4 eq.) of 1,4-dibromobutane (**DBB**).

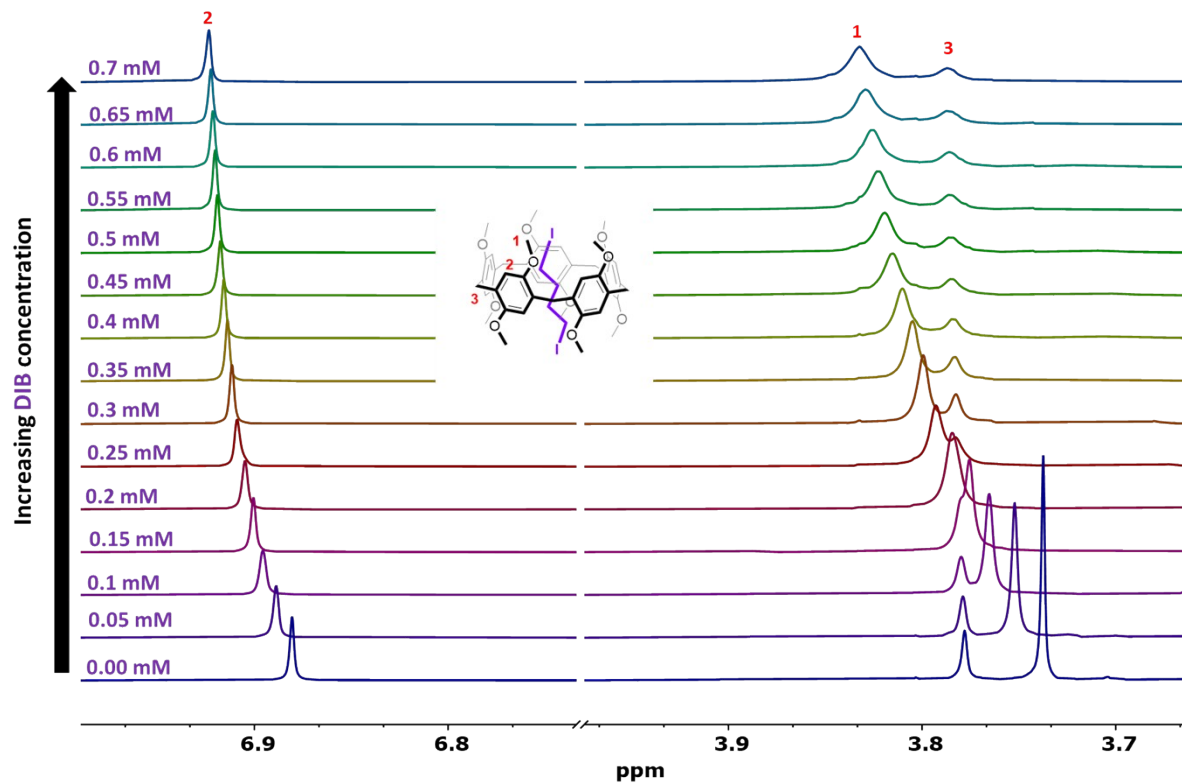

**Figure S8.** Expanded <sup>1</sup>H-NMR (600 MHz, CDCl<sub>3</sub>, 298 K) spectra of **DMP5** (5 mM) with increasing equimolar quantities (0 → 1.4 eq.) of 1,4-diiodobutane (**DIB**).

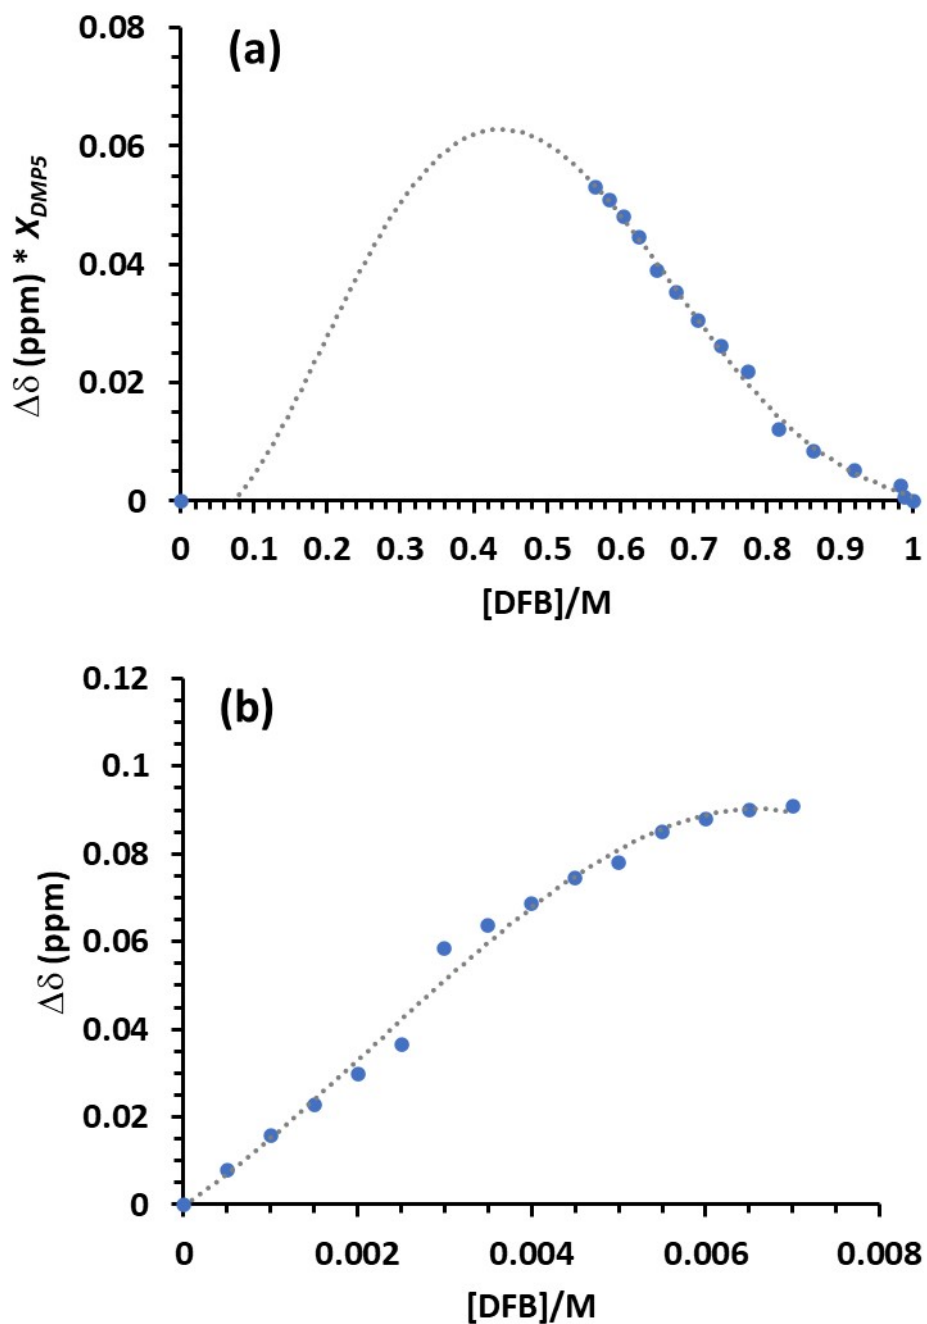

**Figure S9.** Job's plot for complexation of **DMP5** with 1,4-difluorobutane (**DFB**) guest **(a)**, and plot of chemical shift ( $\delta$ ) changes for the host (**DMP5**) aromatic proton at 6.78 ppm as function of guest (**DFB**) concentration **(b)** determined from  $^1\text{H-NMR}$  titration  $\text{CDCl}_3$  at 25 °C.

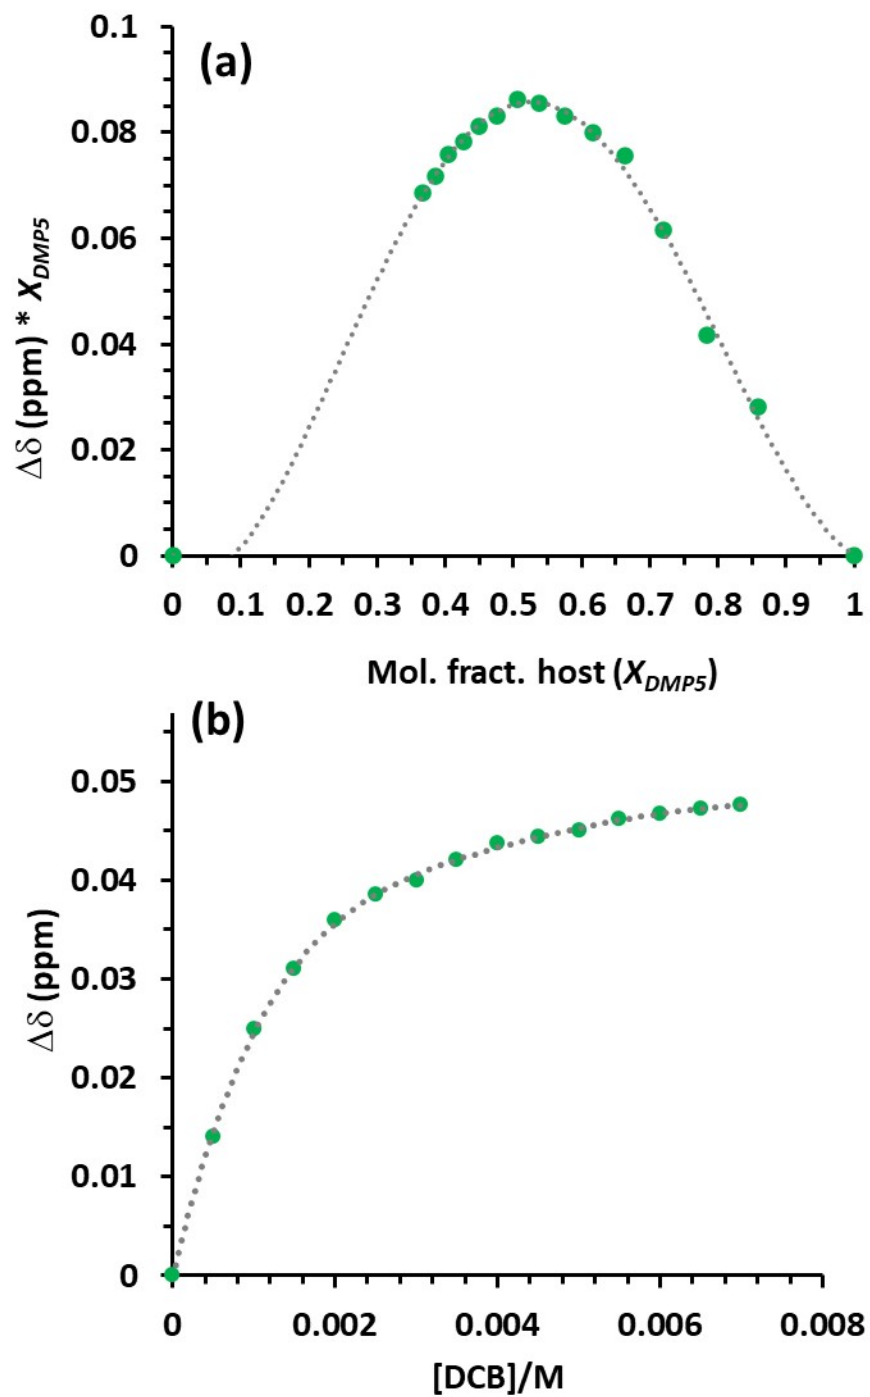

**Figure S10.** Job's plot for complexation of **DMP5** with 1,4-dichlorobutane (**DCB**) guest (**a**), and plot of chemical shift ( $\delta$ ) changes for the host (**DMP5**) aromatic proton at 6.78 ppm as function of guest (**DCB**) concentration (**b**) determined from  $^1\text{H-NMR}$  titration  $\text{CDCl}_3$  at 25  $^\circ\text{C}$ .

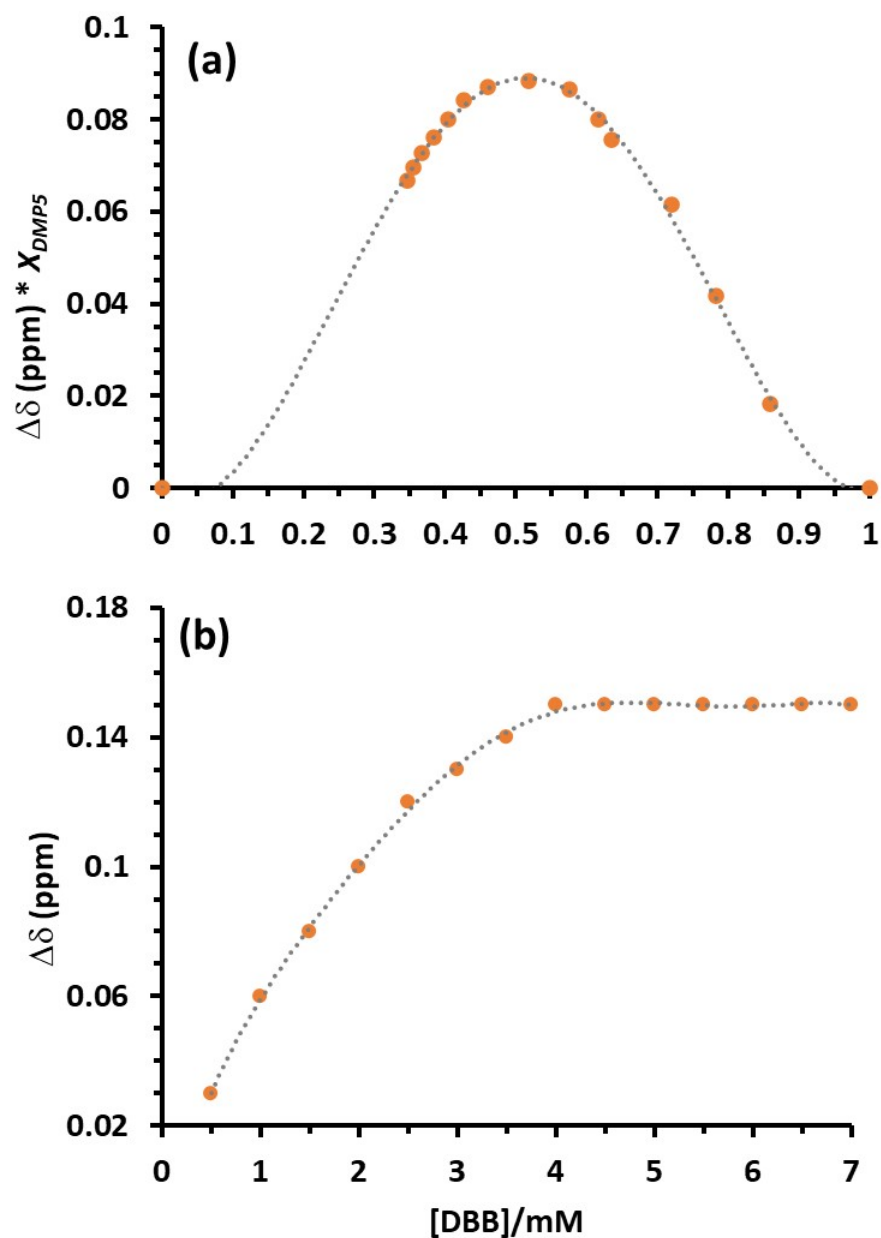

**Figure S11.** Job's plot for complexation of **DMP5** with 1,4-dibromobutane (**DBB**) guest **(a)**, and plot of chemical shift ( $\delta$ ) changes for the host (**DMP5**) aromatic proton at 6.78 ppm as function of guest (**DBB**) concentration **(b)** determined from  $^1\text{H-NMR}$  titration  $\text{CDCl}_3$  at 25 °C.

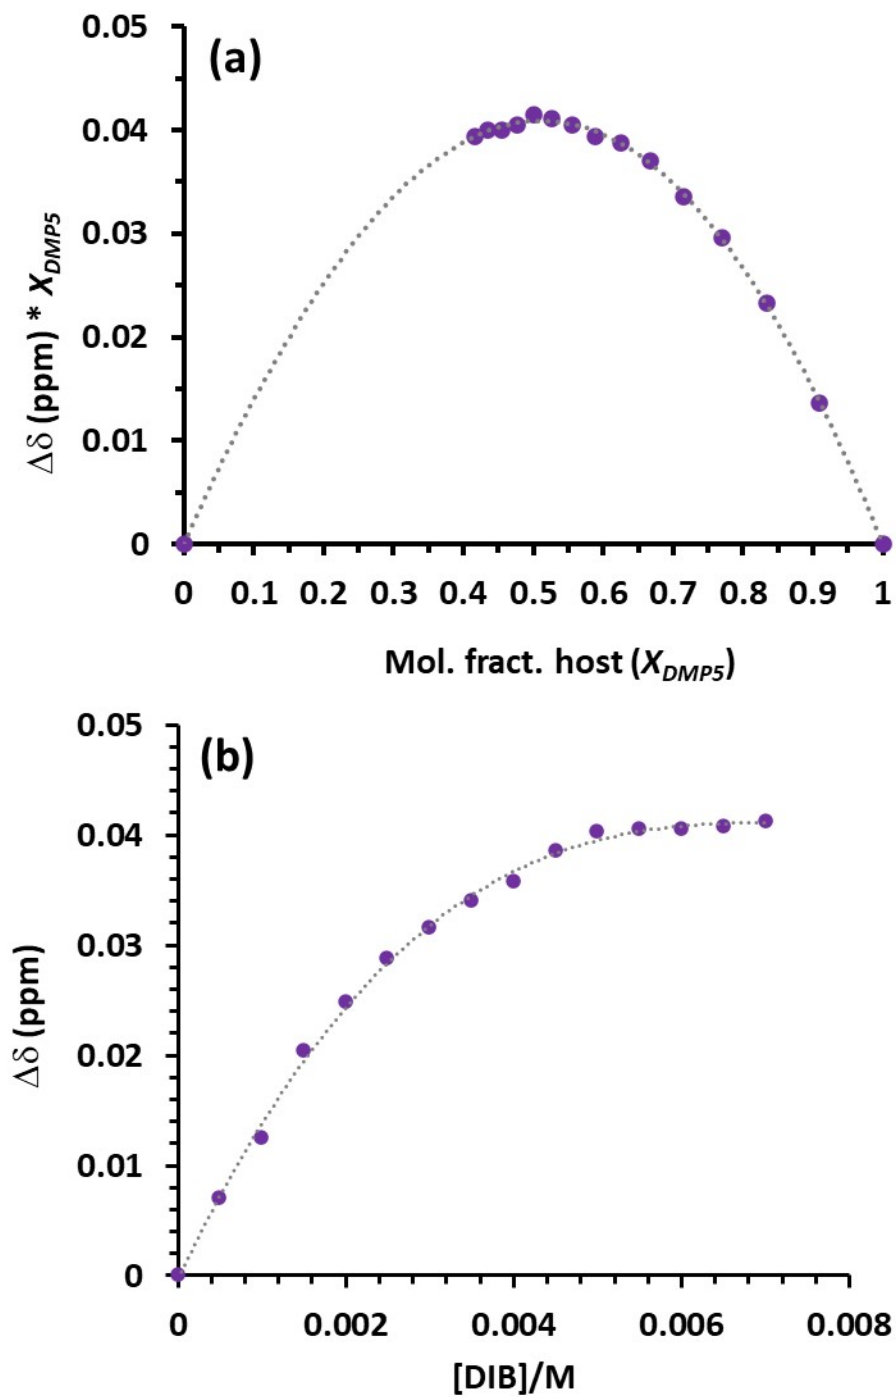

**Figure S12.** Job's plot for complexation of **DMP5** with 1,4-diodobutane (**DIB**) guest (**a**), and plot of chemical shift ( $\delta$ ) changes for the host (**DMP5**) aromatic proton at 6.78 ppm as function of guest (**DIB**) concentration (**b**) determined from  $^1\text{H-NMR}$  titration  $\text{CDCl}_3$  at 25 °C.

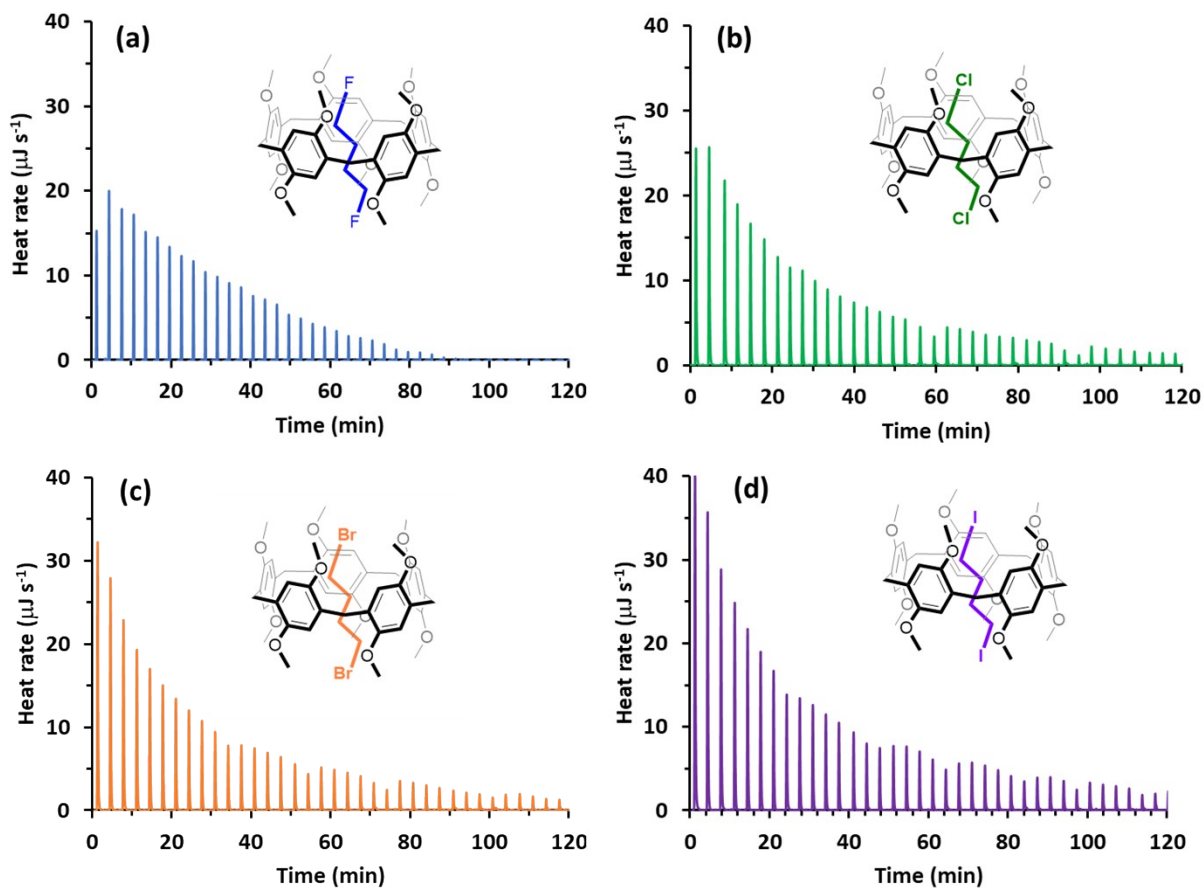

**Figure S13.** Host-guest complexation ITC experiment raw heats for sequential injections at 25 °C in chloroform for 5 mM **DMP5 host** with 1,4-difluorobutane (**DFB**) (a), 1,4-dichlorobutane (**DCB**) (b), 1,4-dibromobutane (**DBB**) (c), and 1,4-diiodobutane (**DIB**) (d).

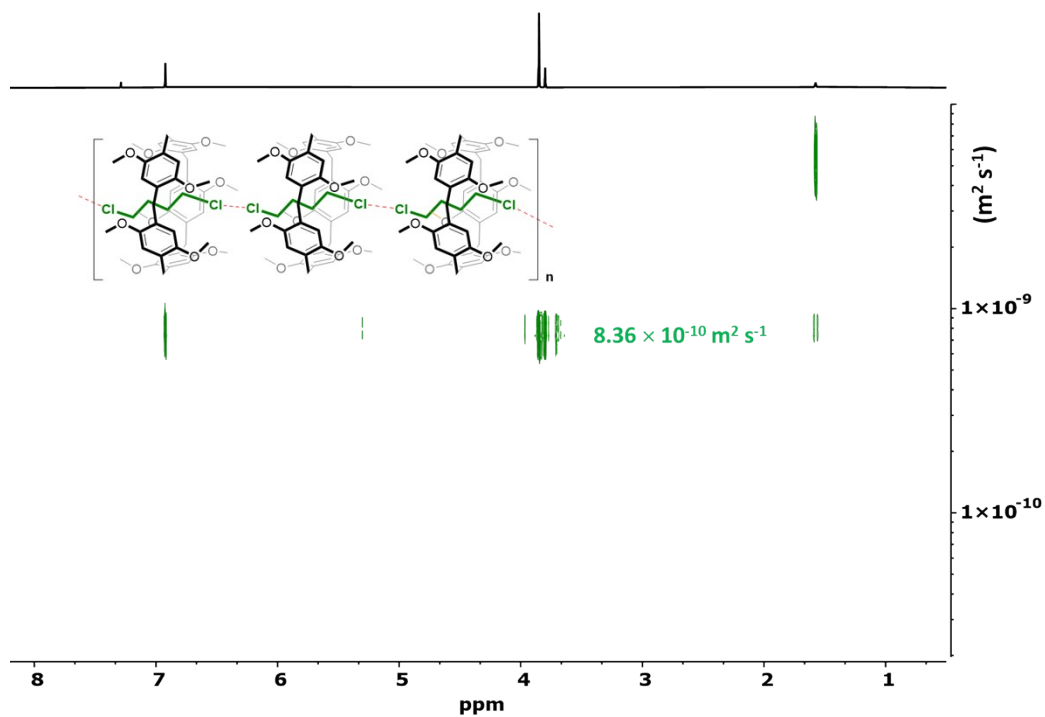

**Figure S14.** 2D-DOSY spectrum (600 MHz,  $\text{CDCl}_3$ , 298 K) for a 5 mM solution of [DMP5 ⊃ DCB].

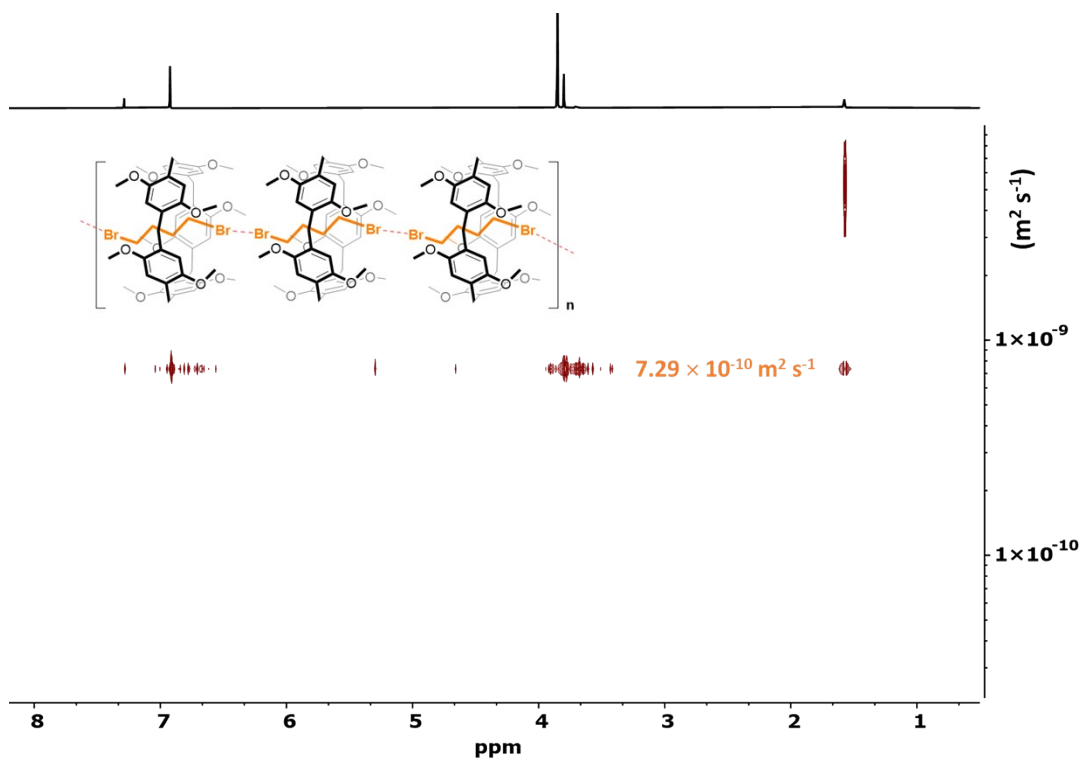

**Figure S15.** 2D-DOSY spectrum (600 MHz,  $\text{CDCl}_3$ , 298 K) for a 5 mM solution of [DMP5 ⊃ DBB].

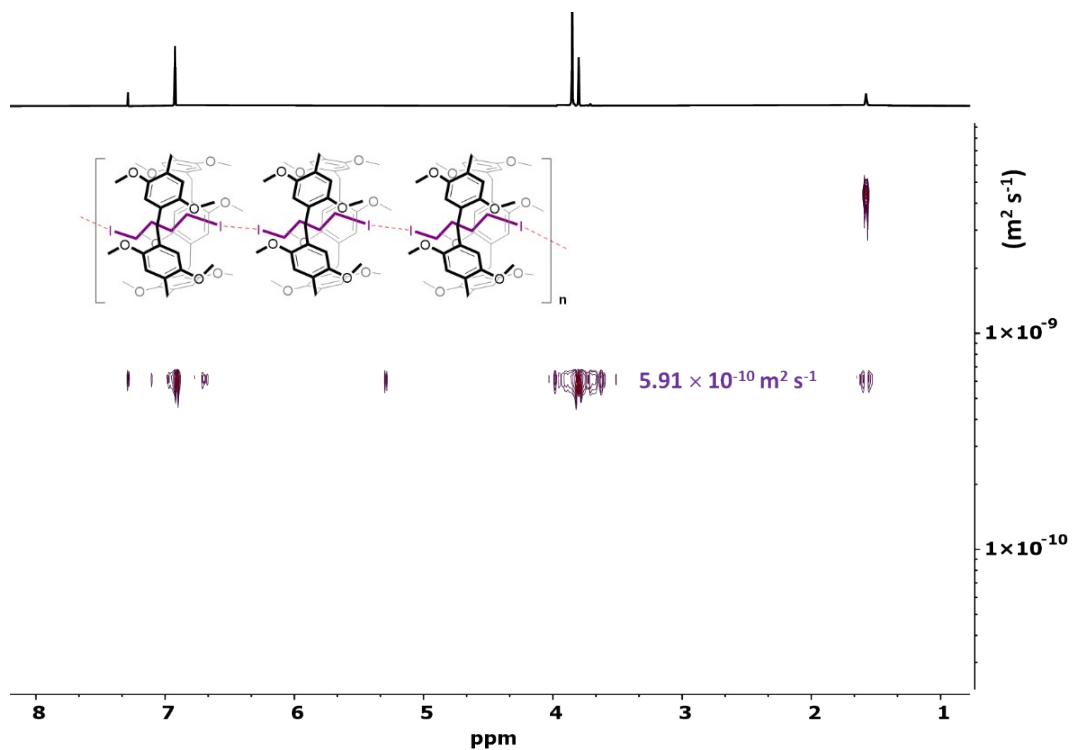

**Figure S16.** 2D-DOSY spectrum (600 MHz,  $\text{CDCl}_3$ , 298 K) for a 5 mM solution of [DMP5 ⊃ DIB].

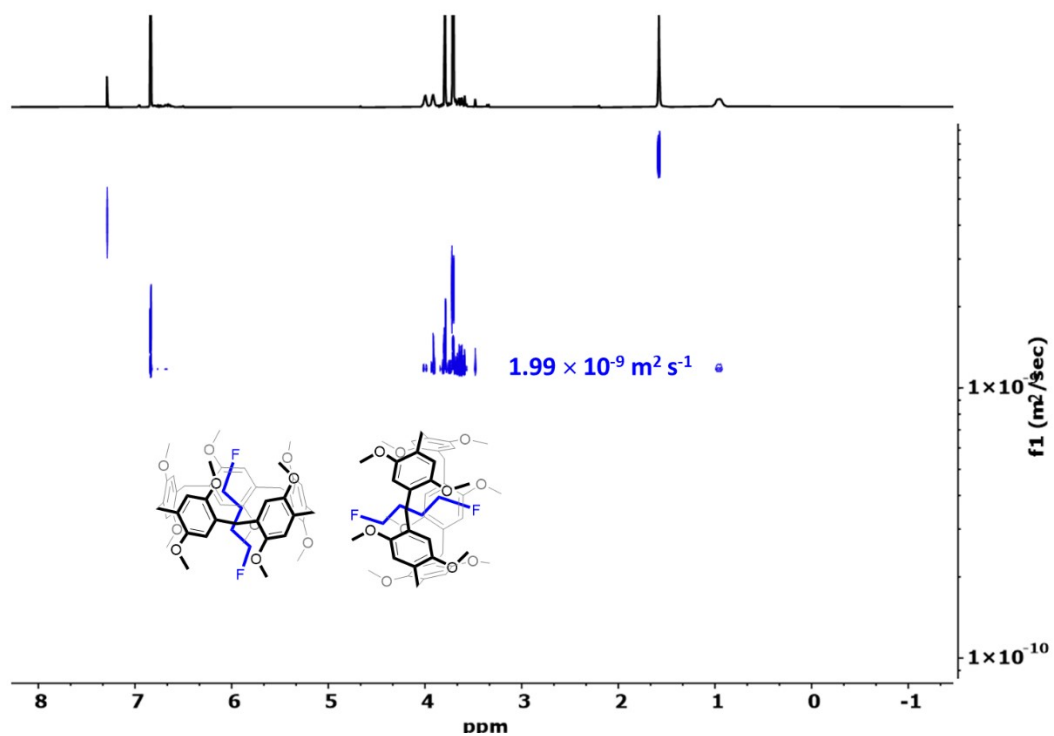

**Figure S17.** 2D-DOSY spectrum (600 MHz,  $\text{CDCl}_3$ , 298 K) for a 5 mM solution of [DMP5 ⊃ DFB].



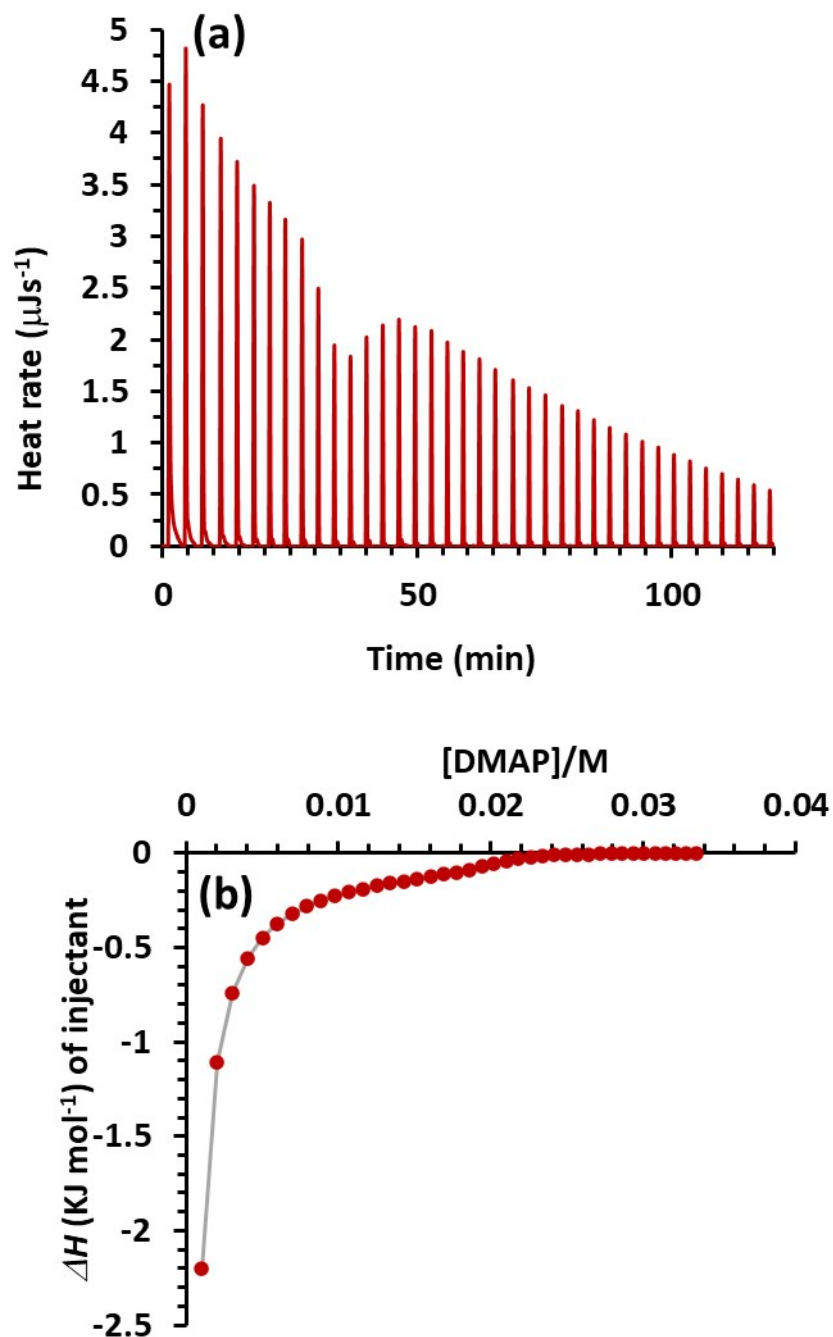

**Figure S18.** (a) ITC experiment raw heats for sequential injections in chloroform inclusion complex  $[\text{DMP5} \supset \text{DIB}]$  with 4-dimethylaminopyridine (**DMAP**) at 25 °C.(b) Net heat of dissociation of 10 mM solutions of  $[\text{DMP5} \supset \text{DIB}]$  promoted by 4-dimethylaminopyridine (**DMAP**) as a function of concentration (M) after subtracting the heat of dilution.

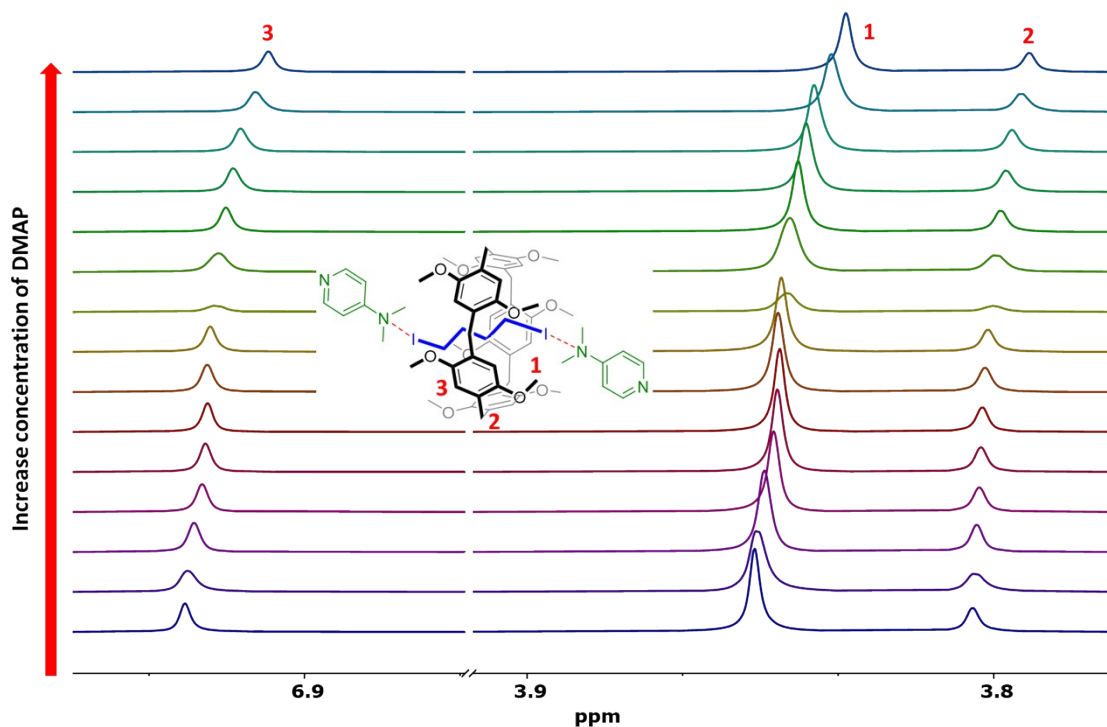

**Figure S19.** Expanded  $^1\text{H-NMR}$  (600 MHz,  $\text{CDCl}_3$ , 298 K) spectra of [DMP5  $\supset$  DIB] (10 mM) with increasing equimolar quantities (0  $\rightarrow$  10 eq.) of 4-dimethylaminopyridine (DMAP).

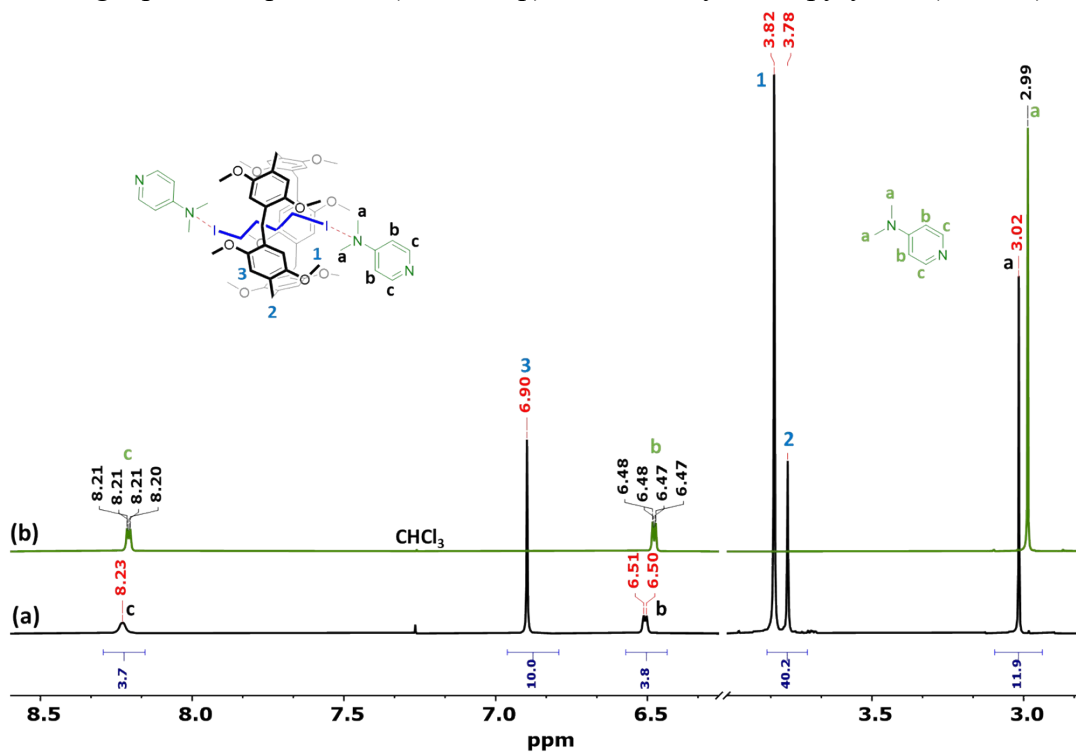

**Fig. 20.**  $^1\text{H-NMR}$  (600 MHz,  $\text{chloroform-d}$ , 298 K) spectra of [DMP5  $\supset$  DIB] with 2 equivalents quantity of DMAP (a), and DMAP alone (b).

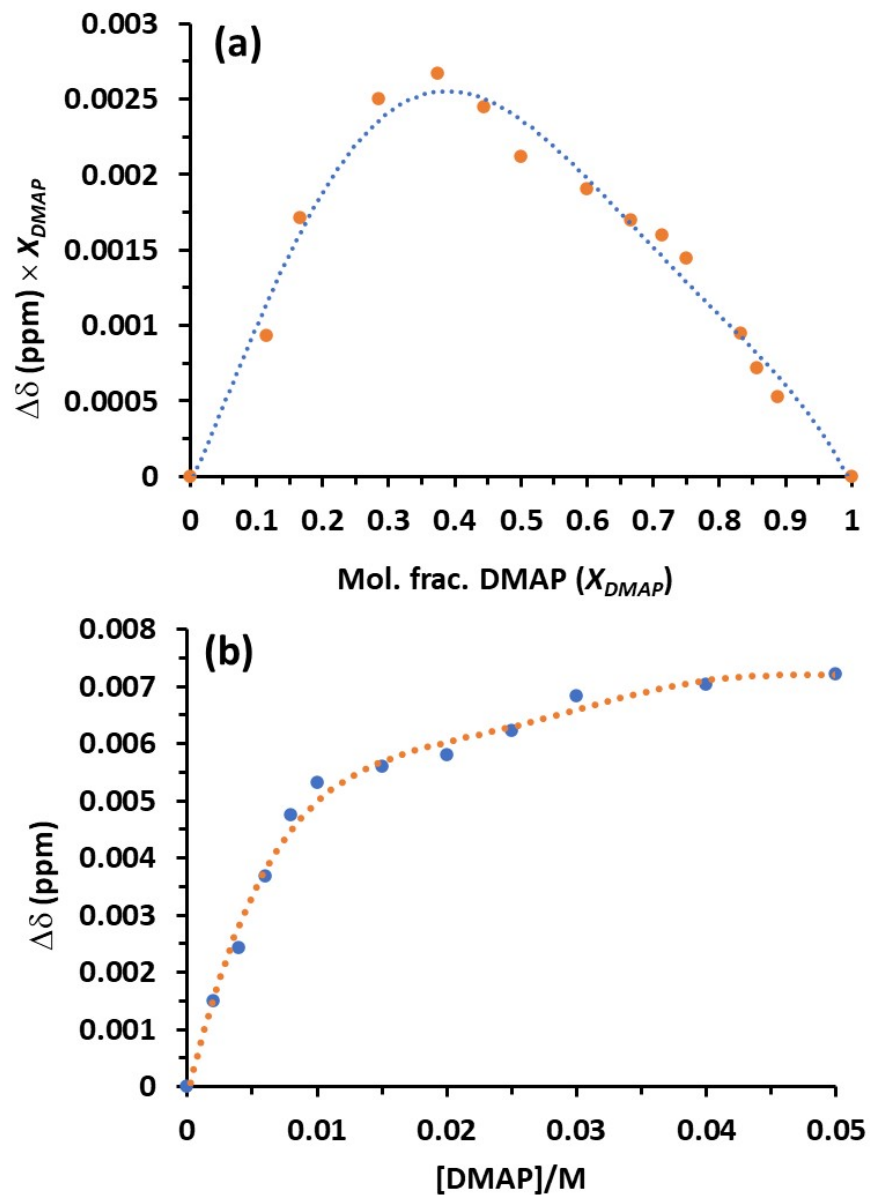

**Figure S21.** Job's plot for complexation of [DMP5  $\supset$  DIB] with 4-dimethylaminopyridine (DMAP) (a), and plot of chemical shift ( $\delta$ ) changes for the host [DMP5  $\supset$  DIB] aromatic proton at 8.15 ppm as function of (DMAP) concentration (b) determined from  $^1\text{H-NMR}$  titration  $\text{CDCl}_3$  at 25  $^\circ\text{C}$ .
